# Supplementary material for: Bladder cancer cells re-educate TAMs through lactate shuttling in the microfluidic cancer microenvironment
Source: PubMed Central journal article supplement (PMC4770766; doi:10.18632/oncotarget.5538), 2015-10-13
Supplement: oncotarget-06-39196-s001.pdf [file oncotarget-06-39196-s001.pdf]

## SUPPLEMENTARY TABLE

Supplementary Table S1: Cell lines and medium in the microfluidic chips

| Experiment | Group        | Chamber 1 |                                          | Chamber 3 |                                          | Chamber 2 and 4            |                                                 |
|------------|--------------|-----------|------------------------------------------|-----------|------------------------------------------|----------------------------|-------------------------------------------------|
|            |              | Cell      | Medium                                   | Cell      | Medium                                   | Cell                       | Medium                                          |
| 1          | control      | RAW264.7  | complete medium <sup>a</sup>             | RAW264.7  | complete medium                          | No cell                    | complete medium                                 |
|            | lactate      | RAW264.7  | complete medium <sup>a</sup>             | RAW264.7  | complete medium                          | No cell                    | complete medium containing 13 mM lactate        |
|            | coculture    | RAW264.7  | complete medium <sup>a</sup>             | RAW264.7  | complete medium                          | T24                        | complete medium                                 |
|            | quercetin    | RAW264.7  | complete medium <sup>a</sup>             | RAW264.7  | complete medium                          | T24                        | complete medium containing 10 $\mu$ M quercetin |
| 2          | control      | RAW264.7  | complete medium                          | RAW264.7  | complete medium                          | T24                        | complete medium                                 |
|            | quercetin    | RAW264.7  | complete medium                          | RAW264.7  | complete medium                          | T24                        | complete medium containing 10 $\mu$ M quercetin |
|            | lactate      | RAW264.7  | complete medium containing 13 mM lactate | RAW264.7  | complete medium containing 13 mM lactate | T24                        | complete medium containing 10 $\mu$ M quercetin |
| 3          | M1 control   | No cell   | complete medium                          | No cell   | complete medium                          | M1 macrophage <sup>b</sup> | complete medium                                 |
|            | M1 coculture | T24       | complete medium                          | T24       | complete medium                          | M1 macrophage <sup>b</sup> | complete medium                                 |
|            | M2 control   | No cell   | complete medium                          | No cell   | complete medium                          | M2 macrophage <sup>b</sup> | complete medium                                 |
|            | M2 coculture | T24       | complete medium                          | T24       | complete medium                          | M2 macrophage <sup>b</sup> | complete medium                                 |
| 4          | control      | No cell   | RPMI1640 supplemented with 15% FBS       | T24       | RPMI1640 supplemented with 1% FBS        | RAW264.7                   | RPMI1640 supplemented with 1% FBS               |
|            | M1 coculture | No cell   | RPMI1640 supplemented with 15% FBS       | T24       | RPMI1640 supplemented with 1% FBS        | M1 macrophage <sup>b</sup> | RPMI1640 supplemented with 1% FBS               |
|            | M2 coculture | No cell   | RPMI1640 supplemented with 15% FBS       | T24       | RPMI1640 supplemented with 1% FBS        | M2 macrophage <sup>b</sup> | RPMI1640 supplemented with 1% FBS               |

<sup>a</sup>When the expression of iNOS and p-NF $\kappa$ B-p65 was tested, RAW264.7 cells were perfused with complete medium with 100 ng/mL LPS and 100 U/mL IFN- $\gamma$  in the first 6 hour, and then perfused with complete medium from 6 to 48 h.

<sup>b</sup>RAW 264.7 cells were pretreated with 100 ng/mL lipopolysaccharide and 100 U/mL interferon- $\gamma$  for 24 h to obtain M1 cells, as well as pretreated with 10 ng/ml IL-4 to obtain M2 cells.
